# Supplementary material
Source: PubMed Central journal article supplement (PMC6460434)
Supplement: 41422_2018_137_MOESM2_ESM.pdf [file 41422_2018_137_MOESM2_ESM.pdf]

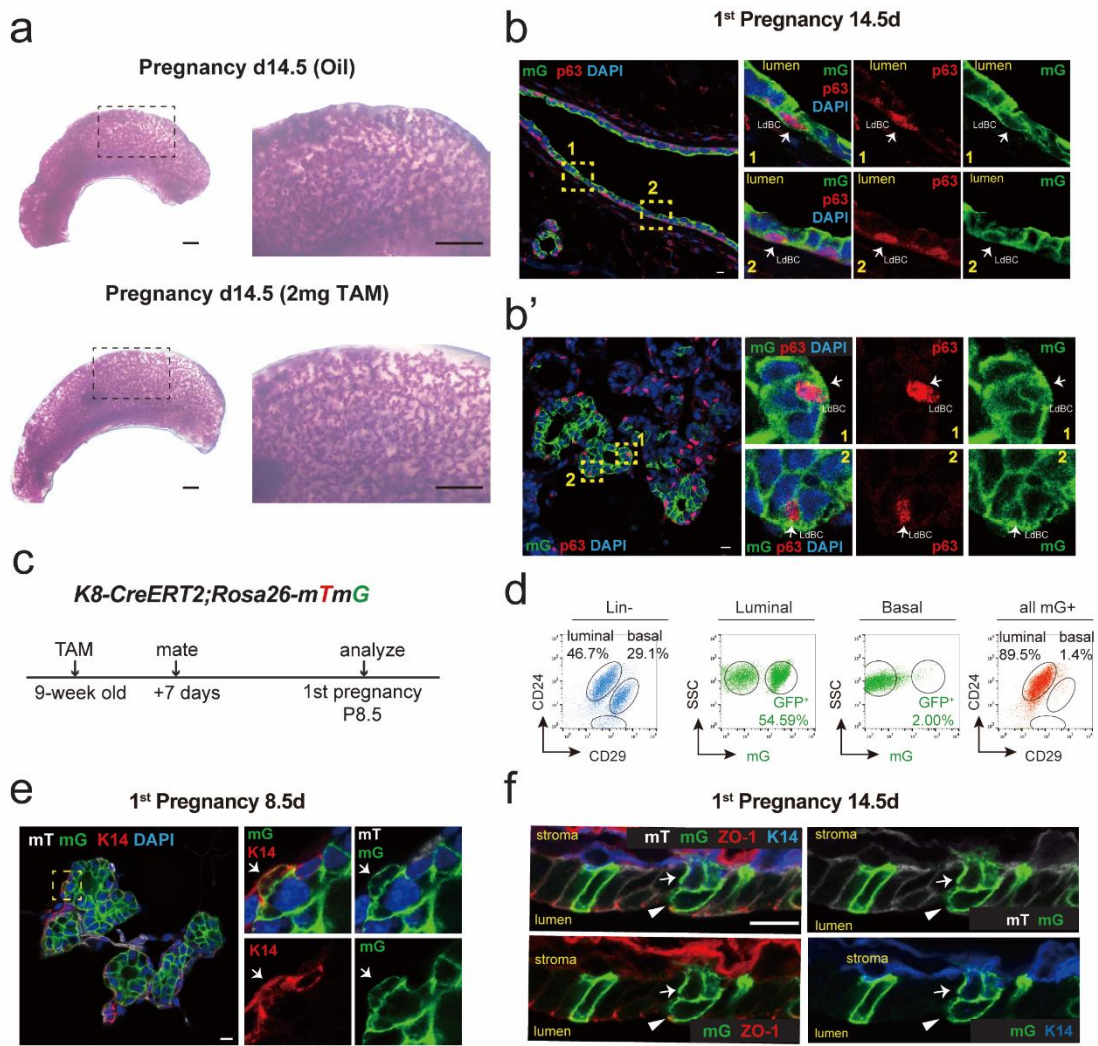

**Supplementary information, Figure S2. LdBCs appear in early pregnancy**

(a) Adult (8 weeks old) C57BL/6 mice were injected with vehicle (sunflower seed oil) or tamoxifen (2 mg per 25 g body weight), and subjected to pregnancy 7 days later. Mammary glands were collected and stained with carmine alum for whole mount analysis at 14.5d of pregnancy. Scale bars, 1 mm.

(b-b') Section confocal imaging showing that basal cells in the bi-lineage clone are positive for basal marker p63, both in the duct (b) and alveolae (b'). Scale bars, 10  $\mu$ m.

(c) Illustration of lineage tracing strategy using *K8-CreERT2;Rosa26-mTmG* mice during tracing of 1<sup>st</sup> early pregnancy.

(d) FACS analysis showing that 54.59% of luminal cells are GFP<sup>+</sup>, and 2% of basal cells are GFP<sup>+</sup> at 8.5 day of 1<sup>st</sup> pregnancy. Among total mGFP<sup>+</sup> cells, 1.4% are in basal compartment.

(e) Section confocal imaging showing that luminal-derived clones contain K14<sup>+</sup> basal cells (arrow). Scale bars, 10  $\mu$ m.

(f) Section imaging indicating LdBC is negative for ZO-1 expression (arrow), while the luminal cell in the clone is ZO-1 positive (arrowhead). Scale bars, 10  $\mu$ m.

Data are pooled from n=3 mice.
