# Supplementary material
Source: PubMed Central journal article supplement (PMC6460434)
Supplement: 41422_2018_137_MOESM3_ESM.pdf [file 41422_2018_137_MOESM3_ESM.pdf]

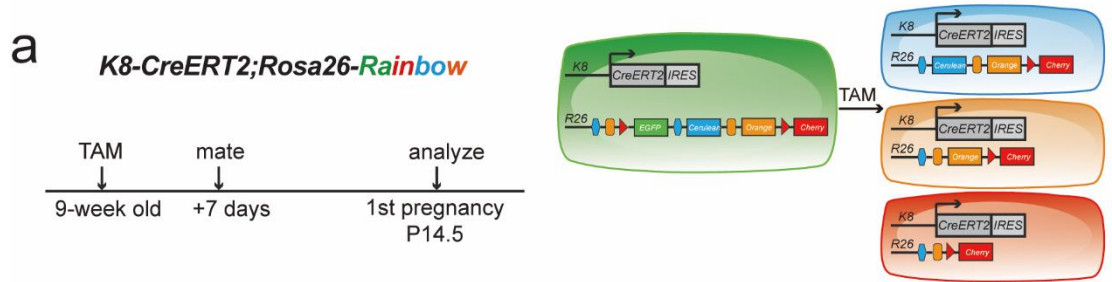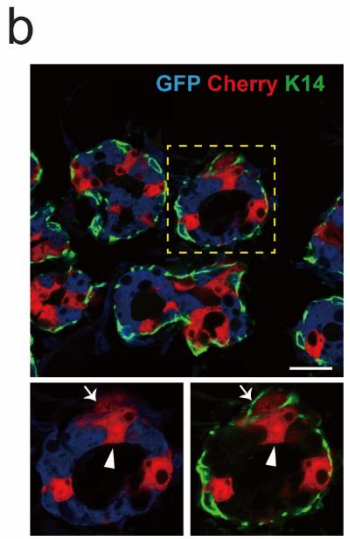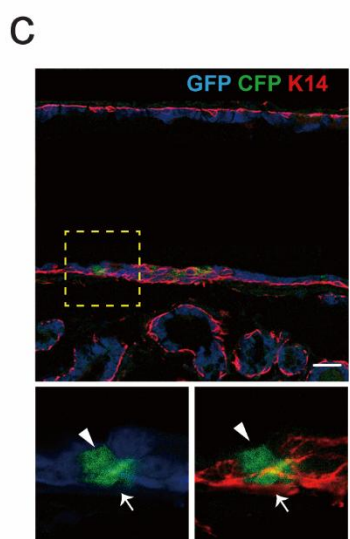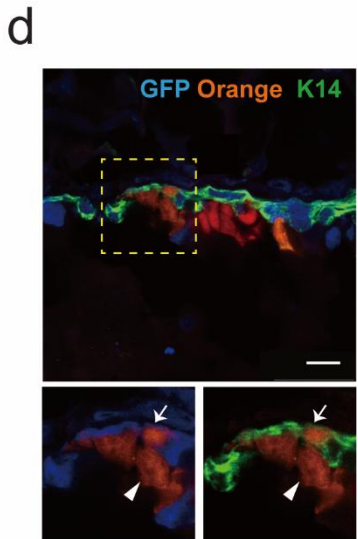

**Supplementary information, Figure S3. Visualized LdBCs in Rainbow mice**

(a) Illustration of *R26-Rainbow* reporter mice tracing strategy.

(b-d) Section confocal imaging showing mCherry-labeled LdBC (b) in alveolae, and CFP-labeled LdBC (c), and Orange-labeled LdBC (d) in ducts that all express K14. Within the clone, luminal cell is indicated by arrowhead, basal cell is indicated by arrow. Scale bars, 10  $\mu\text{m}$ .

Data are pooled from n=3 mice.
