# Supplementary material
Source: PubMed Central journal article supplement (PMC6460434)
Supplement: 41422_2018_137_MOESM4_ESM.pdf [file 41422_2018_137_MOESM4_ESM.pdf]

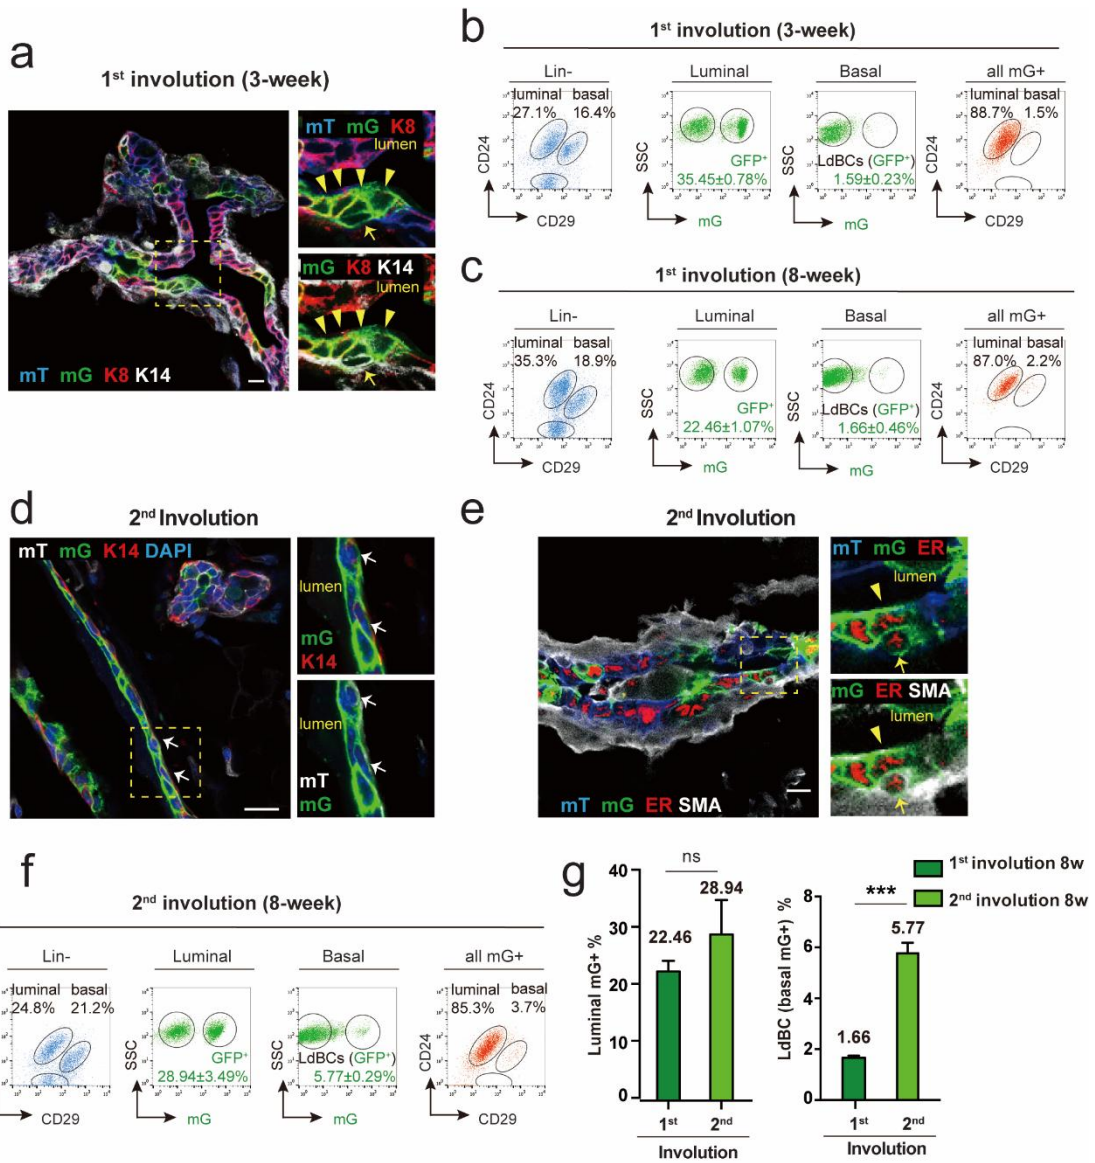

**Supplementary information, Figure S4. LdBCs persist through serial involution**

(a) Section confocal imaging showing that LdBC is K8<sup>-</sup> (arrow) at 3 weeks of 1<sup>st</sup> involution. Luminal cells in the clone are indicated by arrowheads. Scale bars, 10 μm.

(b-c) FACS analysis showing that LdBC (GFP<sup>+</sup> basal cells) percentages are similar between 3 weeks (b) and 8 weeks (c) of involution.

(d,e) Section confocal imaging showing LdBCs in 2<sup>nd</sup> involution are K14<sup>+</sup> (d) and ERα<sup>+</sup> (e). Scale bars, 10 μm.

(f) FACS analysis of LdBCs at 8 weeks of 2<sup>nd</sup> involution.

(g) Quantification based on FACS analysis of luminal cells and LdBCs in 1<sup>st</sup> involution and 2<sup>nd</sup> involution. Data are pooled from three experiments.

\*\*\* p<0.001

Data represent the mean ± SD for n=3 mice.
