# Supplementary material
Source: PubMed Central journal article supplement (PMC6460434)
Supplement: 41422_2018_137_MOESM5_ESM.pdf [file 41422_2018_137_MOESM5_ESM.pdf]

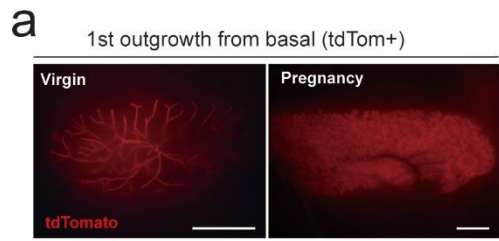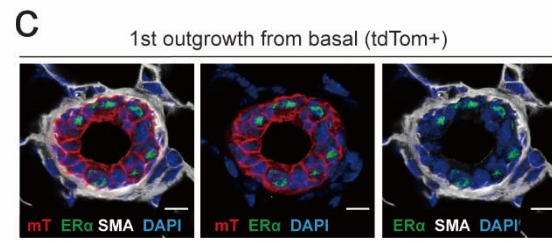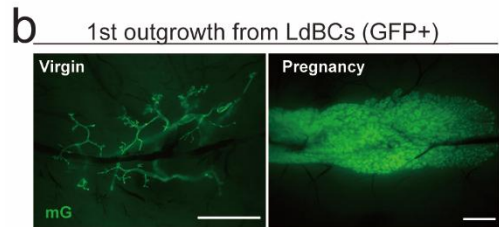

**Supplementary information, Figure S5. LdBCs generate normal mammary outgrowth in 1<sup>st</sup> transplantation**

(a) Whole mount images of outgrowth derived from normal basal cell transplantation (Ctrl, tdTomato<sup>+</sup>). Nulliparous virgin (left) and late pregnant (right) mammary tissues are shown. The shown nulliparous outgrowth was from transplantation of one single cell. Scale bars, 1 mm.

(b) Whole mount images of outgrowth derived from LdBC transplantation (GFP<sup>+</sup>). Nulliparous virgin (left) and late pregnant (right) mammary tissues are shown. The shown nulliparous outgrowth was from transplantation of one single cell. Scale bars, 1 mm.

(c) Immunostaining of ER $\alpha$  and SMA in the section of the outgrowth generated from the transplantation of normal basal cells (tdTomato<sup>+</sup>). Scale bars, 10  $\mu$ m.

Data are pooled from three independent experiments.
