# Supplementary material
Source: PubMed Central journal article supplement (PMC6460434)
Supplement: 41422_2018_137_MOESM7_ESM.pdf [file 41422_2018_137_MOESM7_ESM.pdf]

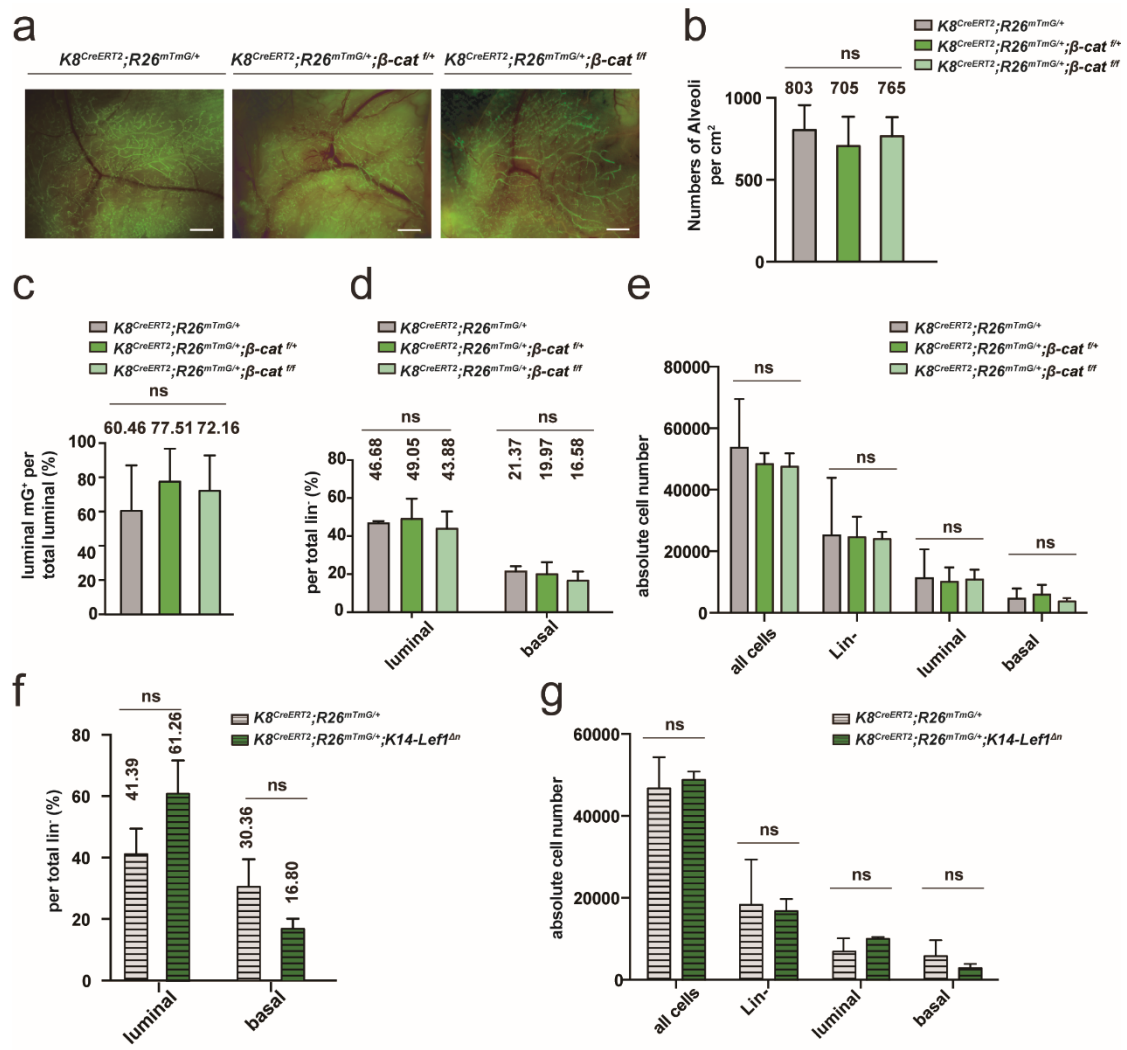

**Supplementary information, Figure S7. Analyses of mammary cellular composition in various genetics models**

- (a) Whole mount images of *K8-CreERT2;R26-mTmG; $\beta$ -cat<sup>fl/fl</sup>* and its control mammary tissues two weeks after hormone stimulation. Scale bars, 1 mm.
- (b) Quantification of alveoli numbers per cm<sup>2</sup> of *K8-CreERT2;R26-mTmG; $\beta$ -cat<sup>fl/fl</sup>* and its control mammary tissues two weeks after hormone stimulation.
- (c) FACS quantification of *K8-CreERT2;R26-mTmG; $\beta$ -cat<sup>fl/fl</sup>* and its control mammary tissues showing that the inhibition of Wnt signaling in luminal cells does not affect GFP<sup>+</sup> luminal percentage in total luminal population. One-way ANOVA, ns p>0.1.
- (d-e) FACS quantification of *K8-CreERT2;R26-mTmG; $\beta$ -cat<sup>fl/fl</sup>* and its control mammary tissues showing the percentages of luminal or basal cells in lin<sup>-</sup> population (d), and the absolute numbers of different cell populations when totally 100k of cells were quantified (e). One-way ANOVA, ns p>0.1.
- (f-g) FACS quantification of *K8-CreERT2;R26-mTmG;K14-Lef1<sup>Δn</sup>* and its control mammary tissues showing the percentage of luminal or basal cells in lin<sup>-</sup> population (f), and the absolute numbers of different cell populations when totally 100k of cells were quantified (g).
- Data represent the mean ± SD for n=3 mice.
